# Supplementary material
Source: PubMed Central journal article supplement (PMC7212061)
Supplement: EMS86318-supplement-ESM_Figures_and_Tables.pdf [file EMS86318-supplement-ESM_Figures_and_Tables.pdf]

ESM Table 1

| Donor no. | Gender | Age | BMI  |
|-----------|--------|-----|------|
| 1         | F      | 22  | 22.8 |
| 2         | F      | 52  | 20.4 |
| 3         | M      | 64  | 27.5 |
| 4         | F      | 60  | 23.6 |
| 5         | M      | 34  | 23.1 |
| 6         | M      | 50  | 24.8 |

Anthropometric data from pancreatic donors. None of the donors had diabetes.

ESM Table 2

Primers, rat:

| Genes   | Forward               | Reverse               |
|---------|-----------------------|-----------------------|
| Slc5a1  | GACTGATTCTCGGCTTCCTG  | GTGAGGAGGGAGATGACCAA  |
| Slc5a2  | TTCTGGGGCTTACCATTGTC  | TTAGAGCAGCCCACCTCAGT  |
| Slc5a4a | GGGAACAGCACTGCCTAGAG  | AGATCGACCAGCCAGAAAGA  |
| Slc5a4b | TTCCACATCTTCCGAGATCC  | CAGCTTCAGGTAGCCACACA  |
| Slc2a1  | GCCCTGGATGTCCTATCTGA  | CCCACGATGAAGTTTGAGGT  |
| Slc2a2  | CAATTTTCATCATCGCCCTCT | TGCAGCAATTTTCGTCAAAAG |
| Slc2a3  | CGAGAGTCCAAGGTTCTTGTC | ACTGGAGGACAACGGAGATG  |
| Slc2a4  | GCTTCTGTTGCCCTTCTGTC  | TGGACGCTCTCTTTCCAAC   |
| Slc2a5  | TGGAAAGATGTGGACATGGA  | CACATATTGGACGTCGTTGC  |
| Hprt1   | GCAGACTTTGCTTTCCTT    | CCGCTGTCTTTTAGGCTT    |

Primers, human:

| Genes        | Forward              | Reverse               |
|--------------|----------------------|-----------------------|
| SLC5A1       | TGCTGGTGGGGTCTTTAATC | GGATCTCGGAAGATGTGGAA  |
| SLC5A2 (# 1) | AGTGCCTGCTCTGGTTTTGT | TTAGGCATAGAAGCCCCAGA  |
| SLC5A2 (# 2) | GACATGTTCTCCGGAGCTGT | GCTCCCAGGTATTTGTCGAA  |
| SLC5A4A      | CATAGCTGAGACCCAGAGC  | GCGAGGAAGAAGCCTCCTAT  |
| SKC2A1       | CTTCACTGTCGTGTCGCTGT | TGAAGAGTTCAGCCACGATG  |
| SLC2A2       | GGAGTTGGCGCTGTAAACAT | AAACTCAGCCACCATGAACC  |
| SLC2A3       | ACCGGCTTCCTCATTACCTT | AGGCTCGATGCTGTTTCATCT |
| SLC2A4       | CTTCGAGACAGCAGGGGTAG | AGGAGCAGAGCCACAGTCAT  |
| SLC2A5       | CATCACTGTTGGCATCCTTG | GCGTCTGTAGGGCTTTCTTG  |
| HPRT1        | ATGCTGAGGATTTGGAAAGG | TAATCCAGCAGGTCAGCAAA  |

Primers, mouse

| Genes   | TaqMan Assay ID/ Primer Sequence                                                                                               |
|---------|--------------------------------------------------------------------------------------------------------------------------------|
| Actb    | Mm02619580_m1                                                                                                                  |
| Slc5a1  | Mm00451203_m1                                                                                                                  |
| Slc5a2  | Fwd: 5' d(GCGATGACCGAAGCGTAAAT) 3'<br>Rev: 5' d(CAAGATCTCGGTGGATATGTTCTCT) 3'<br>Pr: 5' FAM d(TTCCAGCCCAGGGCCTGTTGAA) BHQ-1 3' |
| Slc5a4a | Mm00446582_m1                                                                                                                  |
| Slc5a4b | Mm00452283_m1                                                                                                                  |

Primers pairs used for qPCR-based quantification of glucose transporters

ESM Fig.1

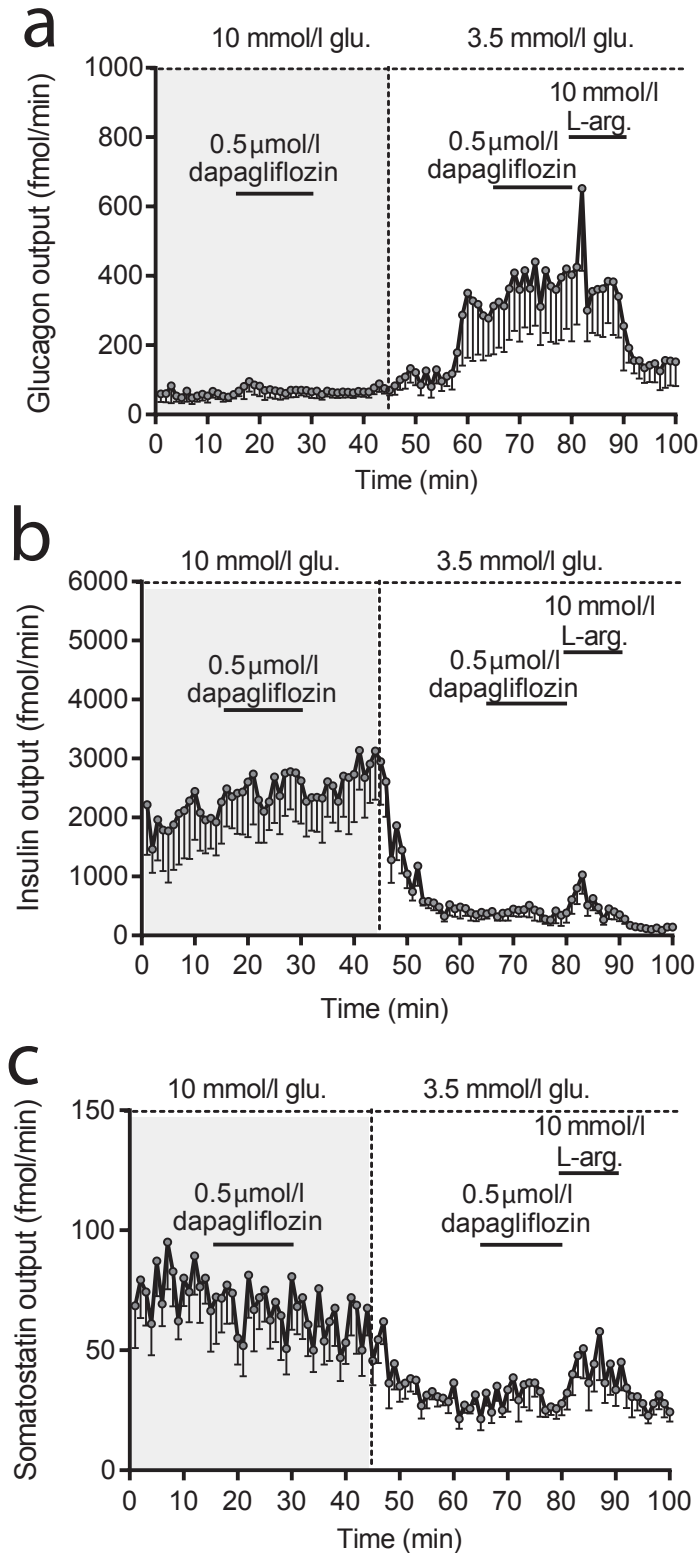

**Effects of dapagliflozin on glucagon, insulin and somatostatin output from isolated perfused rat pancreas.** Data are shown as means  $\pm$  SEM. Glucagon (A), insulin (B) and somatostatin (C) output (fmol/min) 10 mM and 3.5 mM glucose, as indicated, and in absence or presence of dapagliflozin (500 nM, A,B) L-arginine, a known insulin and somatostatin secretagogue, was added at the end of all experiments to control for responsiveness (pos. control).  $n=6$ .

ESM Fig. 2

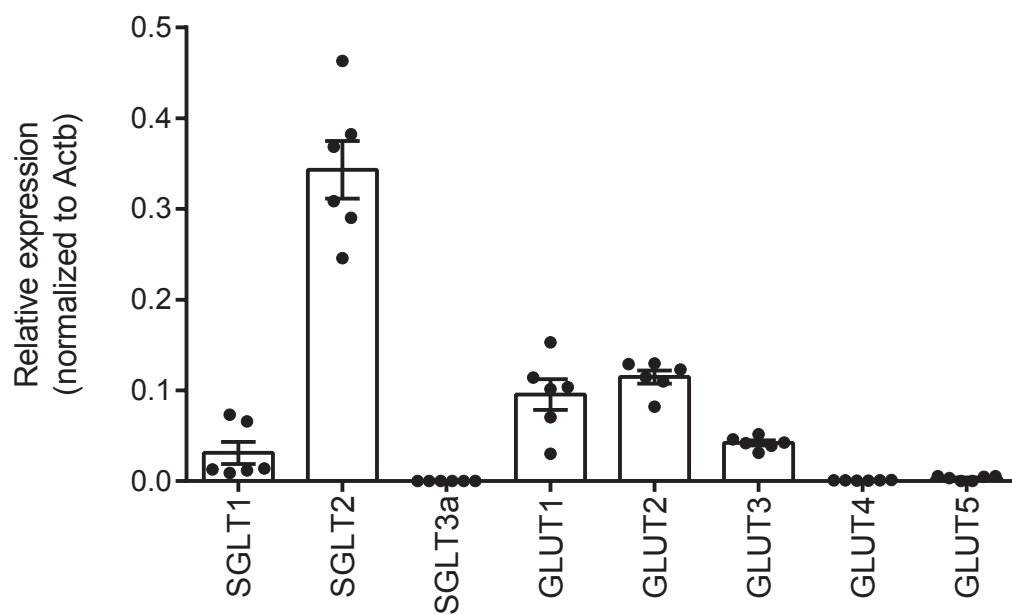

***SLC5A2 (SGLT2)* expression using primer set 1.** Data are shown as mean values  $\pm$  SEM. Relative expression levels of SGLT1, SGLT3a and GLUT1-5 in human islets. Measurements from different individuals are indicated with dots,  $n = 5$ .

ESM Fig. 3

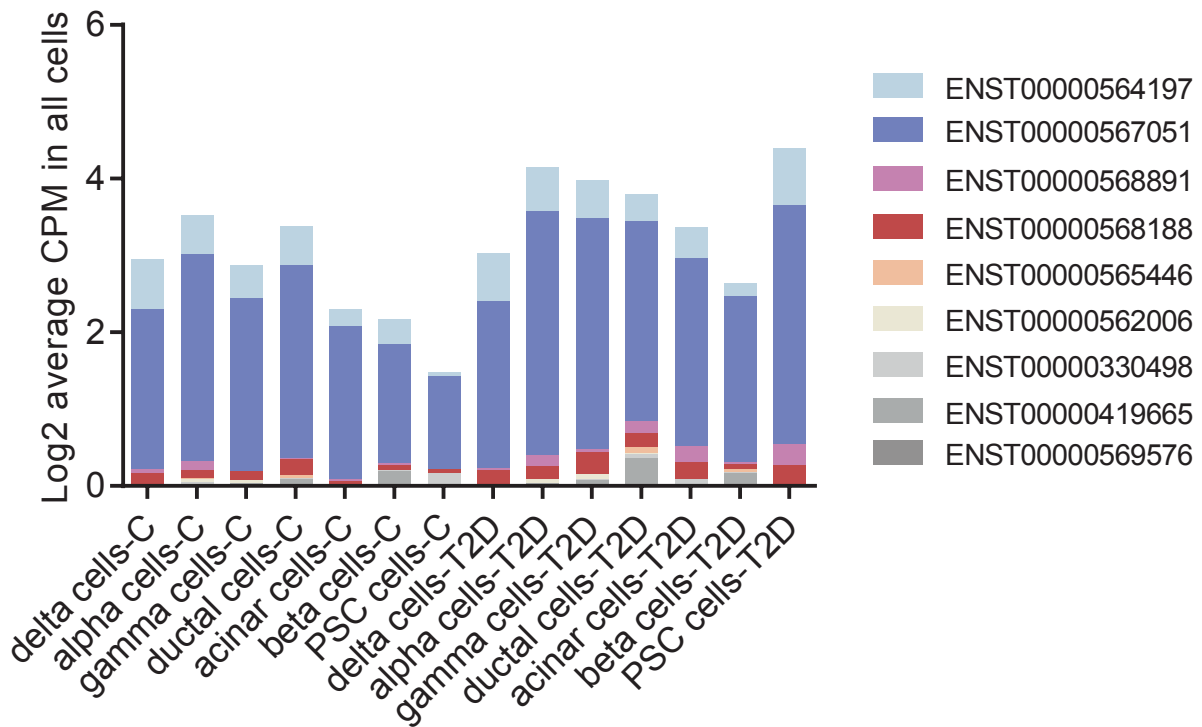

**SLC5A2 transcript expression in single cells from human islet preparations (population 1).** Expression are shown as counts per million (CPM) in indicated cells types from C: non-diabetic donors and T2: donors with type-2-diabetes. Transcript ENST00000564197 and ENST00000567051 overlap with the Slc5a2 sequence but is unrelated to the Slc5a2 gene. Transcript variant ENST00000419665 is a non-coding transcript annotated for nonsense-mediated decay, transcript variant ENS00000330498 is transcript for full-length protein-coding SGLT2.

ESM Fig. 4

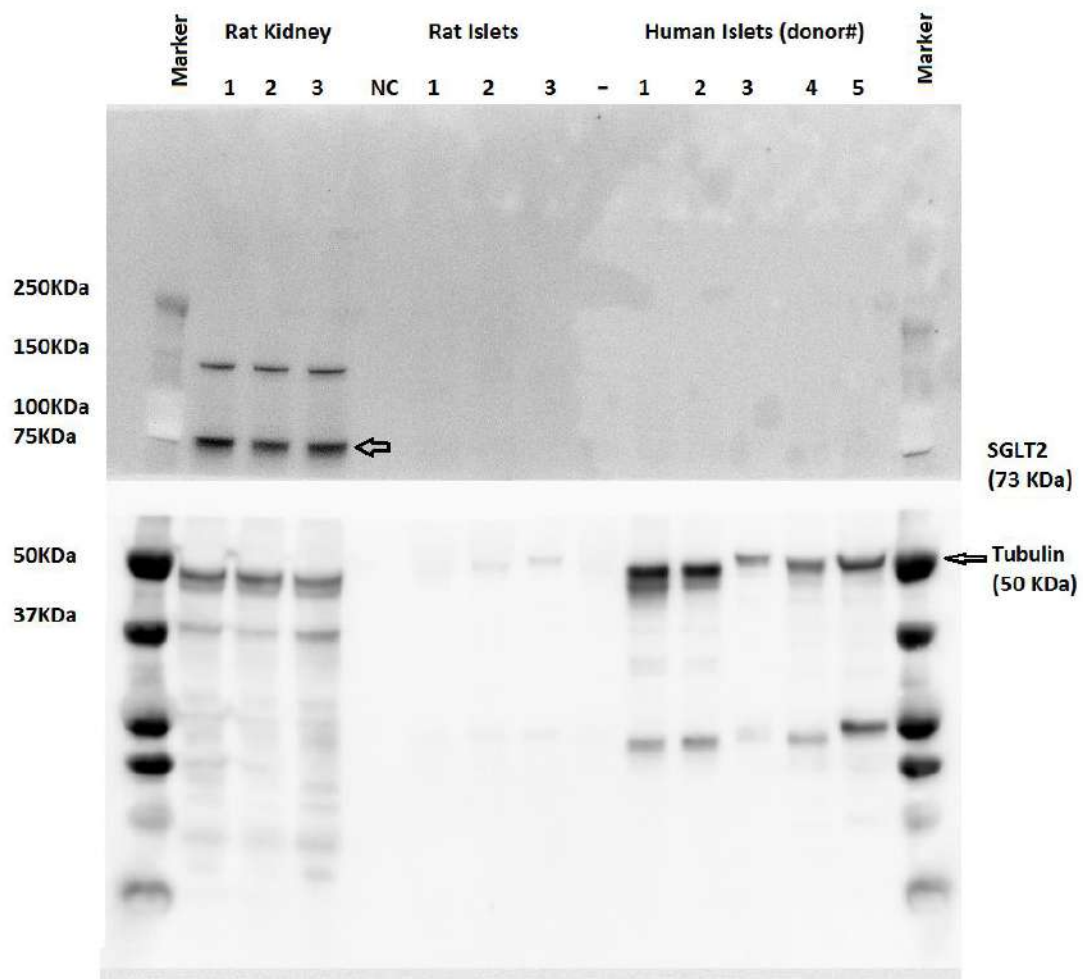

Uncropped Western blot related to fig. 5

c. SGLT2 (73 KDa) and Tubulin (50 KDa; loading control) bands are indicated with black arrows.
